# Supplementary material
Source: PubMed Central journal article supplement (PMC8312698)
Supplement: NIHMS1659986-supplement-Table_S1__gt-vnc_suppTables_.pdf [file NIHMS1659986-supplement-Table_S1__gt-vnc_suppTables_.pdf]

## SUPPLEMENTAL TABLES

|                                                                                 | FIB-SEM+<br>HotKnife         | SBEM                         | ATUM+<br>MultiSEM     | TEMCA2+AL             | TEMCA-GT              |
|---------------------------------------------------------------------------------|------------------------------|------------------------------|-----------------------|-----------------------|-----------------------|
| x,y resolution (nm)                                                             | 8                            | 9                            | 4                     | 4                     | 4                     |
| z resolution (nm)                                                               | 8                            | 20                           | 30                    | 40                    | 40                    |
| raw imaging rate (Mpixels/s)                                                    | 8                            | 10                           | 250                   | 50                    | 43                    |
| effective imaging rate (Mpixels/s)                                              | 5.5                          | 5.9                          | 130                   | 6                     | 26                    |
| microscope cost (each)                                                          | \$1M                         | \$1M                         | \$4-6M                | \$1M                  | \$300k                |
|                                                                                 |                              |                              |                       |                       |                       |
| <b>Imaging a cortical column on one<br/>microscope (1×.5×.5 mm<sup>3</sup>)</b> |                              |                              |                       |                       |                       |
| Typical <i>effective</i> cutting rate<br>(sections/days)                        | in effective<br>imaging rate | in effective<br>imaging rate | 4000                  | 600                   | 4000                  |
| Number of sections                                                              | 125000                       | 25000                        | 16667                 | 12500                 | 12500                 |
| Time to section (days)                                                          | n/a                          | n/a                          | 4                     | 21                    | 3                     |
| Pixels/section                                                                  | 3.91×10 <sup>9</sup>         | 6.17×10 <sup>9</sup>         | 3.13×10 <sup>10</sup> | 3.13×10 <sup>10</sup> | 3.13×10 <sup>10</sup> |
|                                                                                 |                              |                              |                       |                       |                       |
| Effective time to image (days)                                                  | 1028                         | 303                          | 46                    | 768                   | 174                   |

**Table S1 (Related to Figure 1). Throughput and cost comparison of EM connectomics approaches.** Based on published datasets: focused ion beam milling SEM (FIB-SEM) resolution range: x,y,z: 5–8nm (Knott et al., 2008; Xu et al., 2017), serial block-face SEM (SBEM): resolution ranges x,y: 9–16nm, z: 20–30nm (Briggman et al., 2011; Kornfeld et al., 2017; Schmidt et al., 2017). Rates from personal communications with: C.S. Xu and K. Hayworth for FIB-SEM+HotKnife (Xu et al, 2020; Hayworth et al., 2015); R. Schalek for ATUM with multi-beam SEM (ATUM+MultiSEM); and C. Robinson for TEMCA2-AutoLoader (Zheng et al., 2018). Effective imaging rate is defined as the dataset size divided by calendar days from start to end of imaging, including overhead time such as stage movement, microscope downtime, and maintenance.

|                   |            |
|-------------------|------------|
| JEOL 1200EX TEM   | \$ 150,000 |
| GridTape stage    | \$ 50,000  |
| Cameras (4)       | \$ 65,000  |
| Camera lenses (4) | \$ 4,800   |
| Computers (5)     | \$ 12,500  |
| Vacuum parts      | \$ 5,000   |
| Leaded glass      | \$ 5,000   |
| Scaffolding       | \$ 5,000   |
|                   |            |
| Total             | \$ 297,300 |

**Table S2 (Related to Figure 1). TEMCA-GT cost in current US\$.**
